# Supplementary material
Source: Springer Nature journal article supplement (https://www.springermedizin.de/resource/supplementary/12883_2012_740_MOESM2_ESM.pdf/9455682)

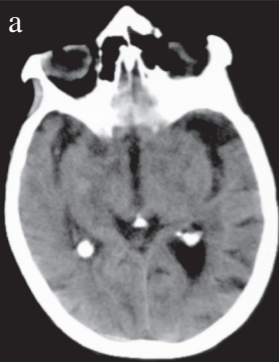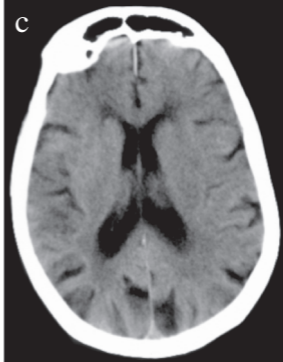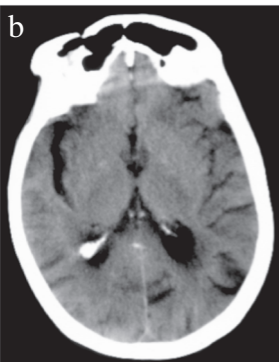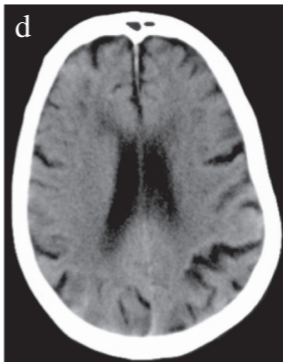

Supplement: MOESM2 [file 9455682]
